# Supplementary material for: Preparation of SrTiO3nanocubes by CO2laser vaporization (LAVA) and hydrothermal maturation
Source: Royal Society of Chemistry journal article supplement (doi:10.1039/d1na00685a), 2021-11-08
Supplement: d1na00685a3.pdf [file d1na00685a3.pdf]

## Supplementary information

### Preparation of SrTiO<sub>3</sub> nanocubes by CO<sub>2</sub> laser vaporization (LAVA) and hydrothermal maturation

Lenka Müller,<sup>a</sup> Philipp Hornig,<sup>a</sup> Janet Grabow<sup>a</sup> and Frank A. Müller<sup>\*a</sup>

<sup>a</sup> Otto-Schott-Institute of Materials Research (OSIM), Friedrich-Schiller-University of Jena, Löbdergraben 32, 07743 Jena, Germany.

\* Corresponding author: frank.mueller@uni-jena.de

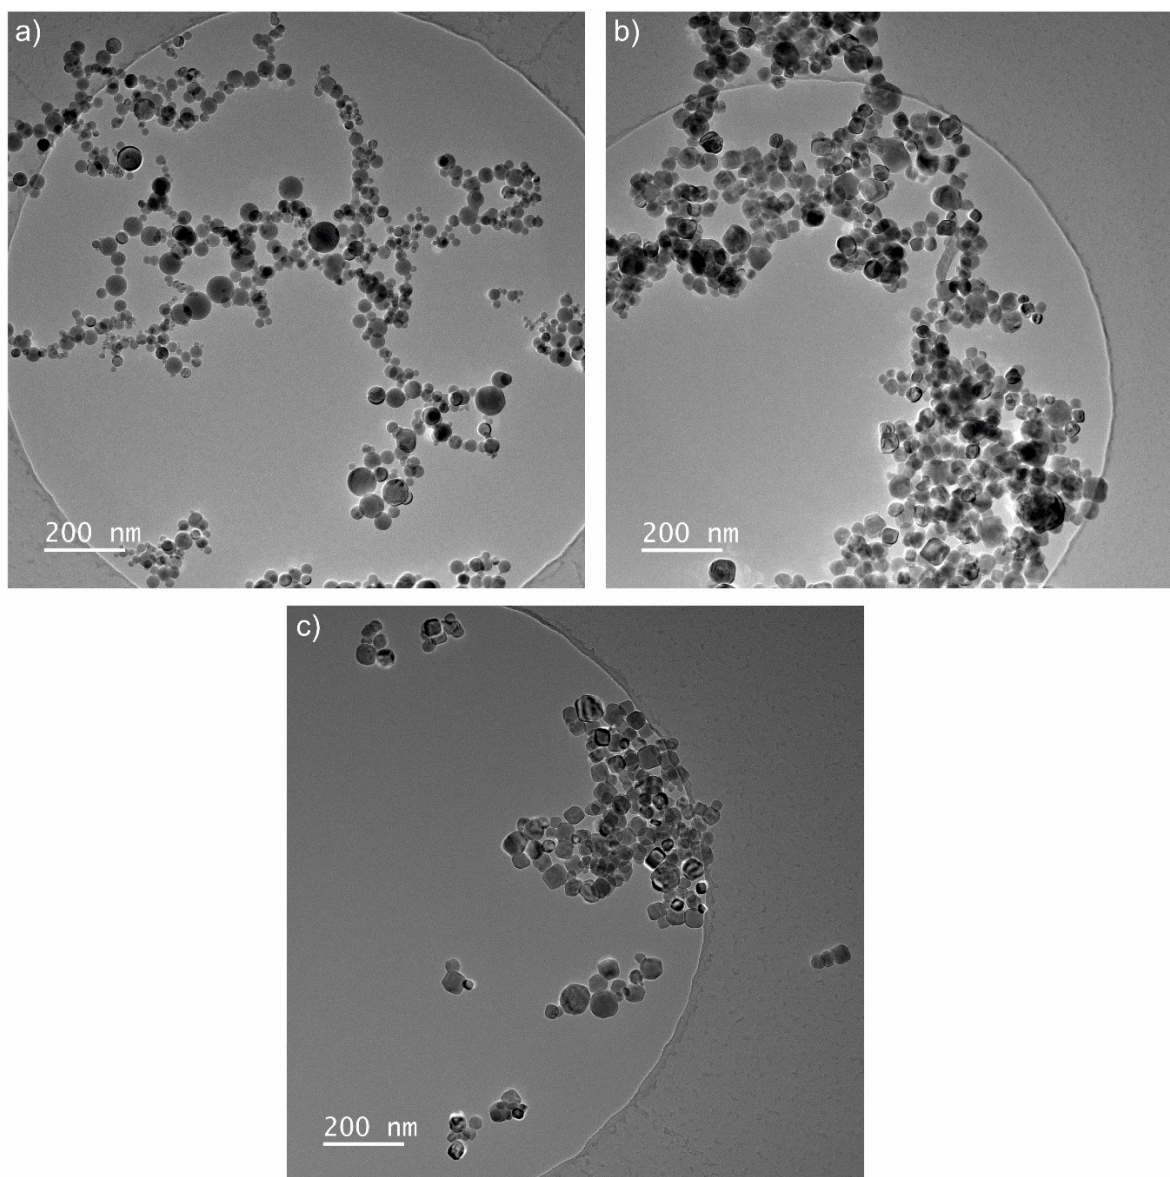

**Fig.S1** Comparison of the overall morphology of (a) STO-LV, (b) STO-LV-hy, and (c) STO-LV-hy HCl analysed by TEM.
