# Supplementary figures and images for: Preparation of SrTiO3nanocubes by CO2laser vaporization (LAVA) and hydrothermal maturation
Source: Royal Society of Chemistry journal article supplement (doi:10.1039/d1na00685a), 2021-11-08

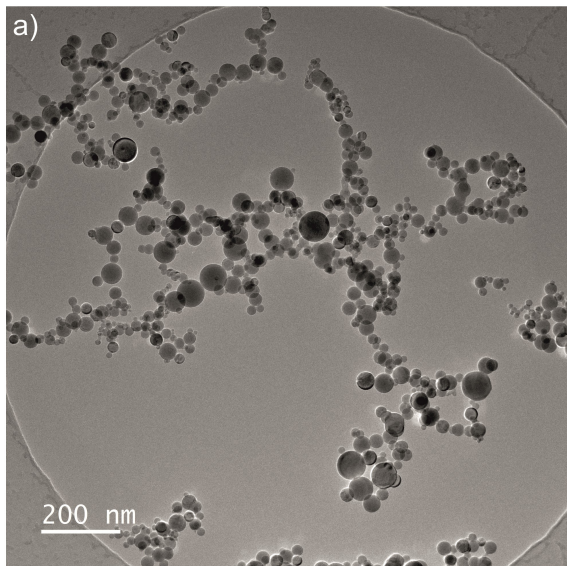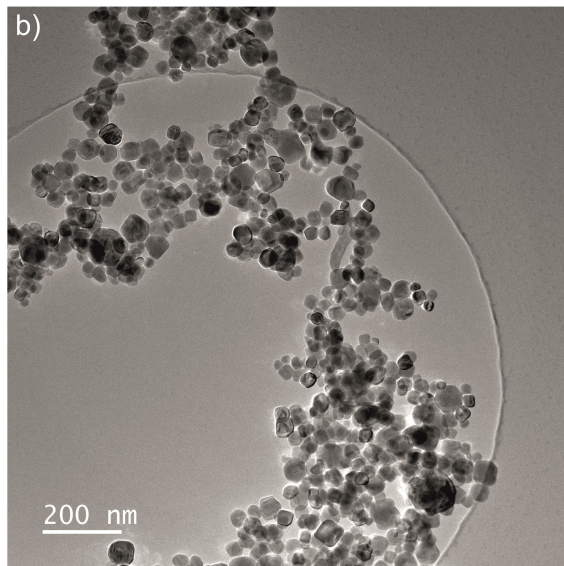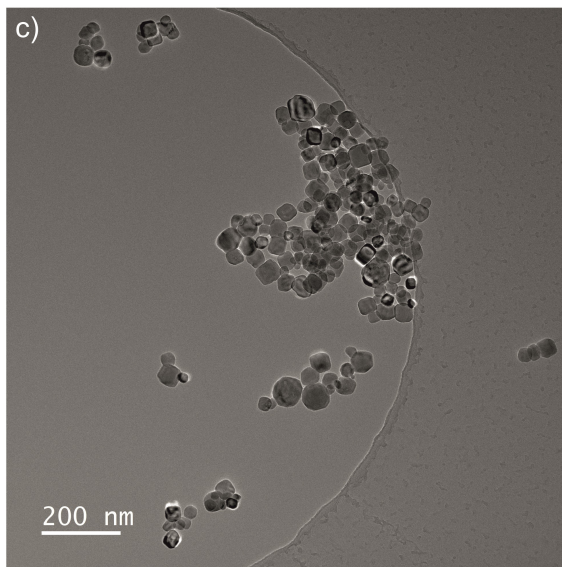

Supplement: d1na00685a2.pdf [file d1na00685a2.pdf]
